# Supplementary material for: Do female and male dental students have different perspectives of professional activity in their offices?
Source: Research Square preprint supplement (doi:10.21203/rs.3.rs-5858575/v1), 2025-07-25
Supplement: Supplementary file 1 [file a02c968cfb765ba695be92b3.docx]

**Attachment**

The questionnaire used in this project

Dear Student,

This questionnaire has been designed to evaluate the Level of Interest towards Specialized Treatments among Dental Interns in Future. It is hoped that the results will be taken into consideration by the relevant authorities for future planning. The organizers of this project would like to express their gratitude in advance for your time and for completing this questionnaire.

Age: ------ Gender: -------

The admission process into the School of Dentistry:

Tuition-free Tuition-paying International

A)

1. What is your level of willingness to continue your education in specialized courses?

Very Low Low Middle High Very High

2. In case of unwillingness to continue education or failure to enter the specialized course, how willing are you to engage in general dentistry?

Very Low Low Middle High Very High

3. To what extent has your level of interest in the field of dentistry influenced your choice of this field?

Very Low Low Middle High Very High

4. In your opinion, how sufficient is the education in the general dentistry course for your independent practice in the future?

Very Low Low Middle High Very High

5. If you work as a general dentist, to what extent will you perform specialized treatments that you did not learn during your studies?

Very Low Low Middle High Very High

B) If you are interested in pursuing specialized treatments, which of the following methods do you consider most suitable for acquiring skills? (Please rate each item from 1 to 5.)

| N |  | 1 | 2 | 3 | 4 | 5 |
| --- | --- | --- | --- | --- | --- | --- |
| 1 | Studying new books and articles |  |  |  |  |  |
| 2 | Watching various films and online tutorials by instructors |  |  |  |  |  |
| 3 | Participating in conferences and refresher courses |  |  |  |  |  |
| 4 | Participation in private practice workshops |  |  |  |  |  |

C) Regarding your level of interest in various treatments in your future general dental practice, please rate each item from 1 to 5.

| N |  | 1 | 2 | 3 | 4 | 5 |
| --- | --- | --- | --- | --- | --- | --- |
| 1 | Bleaching |  |  |  |  |  |
| 2 | Simple amalgam restoration |  |  |  |  |  |
| 3 | Complex amalgam restoration |  |  |  |  |  |
| 4 | Simple composite restoration |  |  |  |  |  |
| 5 | Complex Anterior and Posterior composite restoration Composite veneer |  |  |  |  |  |
| 6 | Smile design and Complex esthetic restoration |  |  |  |  |  |
| 7 | Ceramic laminate veneers |  |  |  |  |  |
| 8 | Posterior ceramic restoration ( Inlay, Onlay , Endocrown) |  |  |  |  |  |
| 9 | PFM crown |  |  |  |  |  |
| 10 | Ceramic crown |  |  |  |  |  |
| 11 | Implant crown |  |  |  |  |  |
| 12 | Custom-made post and core |  |  |  |  |  |
| 13 | Prefabricated post and core |  |  |  |  |  |
| 14 | Fixed bridge |  |  |  |  |  |
| 15 | Cobalt-Chromium removable partial dentures |  |  |  |  |  |
| 16 | Acrylic removable partial denture |  |  |  |  |  |
| 17 | Complete denture |  |  |  |  |  |
| 18 | Immediate Dentures |  |  |  |  |  |
| 19 | Single arch denture |  |  |  |  |  |
| 20 | Night guard |  |  |  |  |  |
| 21 | Denture Reline and Rebase |  |  |  |  |  |
| 22 | Implant-supported removable dentures |  |  |  |  |  |
| 23 | Root canal treatment with hand instruments |  |  |  |  |  |
| 24 | Root canal treatment with rotary instruments |  |  |  |  |  |
| 25 | Root canal treatment of anterior teeth and premolars |  |  |  |  |  |
| 26 | Root canal treatment of posterior teeth |  |  |  |  |  |
| 27 | Root Canal Treatment on a Wisdom Tooth |  |  |  |  |  |
| 28 | Curved and calcified root canals treatment |  |  |  |  |  |
| 29 | Root canal retreatment |  |  |  |  |  |
| 30 | Open apex root canal and specific cases treatment |  |  |  |  |  |
| 31 | Apicoectomy |  |  |  |  |  |
| 32 | Simple pediatric dental restorations |  |  |  |  |  |
| 33 | Oral hygiene education and fluoride treatment for children |  |  |  |  |  |
| 34 | Fissure sealant |  |  |  |  |  |
| 35 | Primary Tooth Pulpotomy |  |  |  |  |  |
| 36 | Primary Tooth Pulpectomy |  |  |  |  |  |
| 37 | Extraction of primary teeth |  |  |  |  |  |
| 38 | Stainless steel crowns |  |  |  |  |  |
| 39 | **Outpatient Treatment for Children with Behavioral Problems** |  |  |  |  |  |
| 40 | **Anesthesia Treatment in Specialized Centers for Children** |  |  |  |  |  |
| 41 | **Anesthesia Treatment in Specialized Centers for Adults** |  |  |  |  |  |
| 42 | Management of Traumatic Dental Injuries to children primary and permanent dentition |  |  |  |  |  |
| 43 | Management of Traumatic Dental Injuries to adult permanent dentition |  |  |  |  |  |
| 44 | Management of Traumatic Dental Injuries to intra oral soft tissue |  |  |  |  |  |
| 45 | **Soft Tissue Biopsy**  **for Diagnostic and Therapeutic Procedures** |  |  |  |  |  |
| 46 | Removal of oral soft tissue lesions (including Epulis , Fibroma , Mucocele) |  |  |  |  |  |
| 47 | **Drug Treatment for Oral Mucosal Lesion like Candida.** |  |  |  |  |  |
| 48 | Intraoral diagnostic radiography (Bitewing ,Periapical ,Occlusal ) |  |  |  |  |  |
| 49 | Surgical extraction of Non-Restorable Teeth |  |  |  |  |  |
| 50 | Surgical extractionof impacted and semi- impacted Teeth |  |  |  |  |  |
| 51 | Dental implant surgery |  |  |  |  |  |
| 52 | Complete maxillary and mandibular SRP |  |  |  |  |  |
| 53 | Dental prophylaxis and oral hygiene education |  |  |  |  |  |
| 54 | Frenectomy |  |  |  |  |  |
| 55 | Periodontal flap surgery |  |  |  |  |  |
| 56 | Crown lengthening surgery |  |  |  |  |  |
| 57 | Sinus lift surgery |  |  |  |  |  |
| 58 | Gum Tissue Graft Surgery |  |  |  |  |  |
| 59 | Dental Bone Grafting |  |  |  |  |  |
| 60 | Preventative and Removable Orthodontic Treatment |  |  |  |  |  |
| 61 | Fixed orthodontic treatment |  |  |  |  |  |
| 62 | Serial extraction for space management |  |  |  |  |  |
| 63 | **Beauty Treatments Such as Gel and Filler Injections** |  |  |  |  |  |
| 64 | **Use of Lasers for** cosmetic **Purposes** |  |  |  |  |  |
| 65 | **Use of Lasers for Therapeutic Purposes** |  |  |  |  |  |
